# Supplementary material for: Histone Methyltransferase Gene SETD2 Is a Novel Tumor Suppressor Gene in Clear Cell Renal Cell Carcinoma
Source: Oxford University Press journal article supplement (doi:10.1158/0008-5472.can-10-0120), 2010-05-25
Supplement: 00085472can100120-sup-stab_1.xlsx [file 00085472can100120-sup-stab_1.xlsx]

## Sheet: Blad1
Supplementary Table 1. Characteristics primary cRCC tumour samples
Tumour	Age at	Sex	TNM	Stage	Diagnosis (WHO)
	diagnosis
T-1	70	F	pT1aGxNxMx	?	Clear cell renal cell carcinoma
T-2	60	M	pT3bG3-4NxM0	III	Clear cell renal cell carcinoma
T-3	67	M	pT3bG1NxM0	III	Clear cell renal cell carcinoma
T-4	66	F	T2G1N0M0	III	Renal cell carcinoma
T-5	66	M	pT1aG2NxMx	?	Clear cell renal cell carcinoma
T-6	46	F	pT1G1NxMx	?	Clear cell renal cell carcinoma
T-7	52	M	T2G1N0M0	II	Clear cell renal cell carcinoma
T-8	84	F	pT3abG4NxMx	?	Clear cell renal cell carcinoma
T-9	68	M	pT1aG2NxM0	?	Clear cell renal cell carcinoma
T-10	82	F	pT1G2bN0Mx	?	Clear cell renal cell carcinoma
T-11	70	F	T3G3N1M0	III	Clear cell renal cell carcinoma
