# Supplementary material for: Histone Methyltransferase Gene SETD2 Is a Novel Tumor Suppressor Gene in Clear Cell Renal Cell Carcinoma
Source: Oxford University Press journal article supplement (doi:10.1158/0008-5472.can-10-0120), 2010-05-25
Supplement: 00085472can100120-sup-stab_3.xlsx [file 00085472can100120-sup-stab_3.xlsx]

## Sheet: Blad1
Supplementary Table 3. Overview of SETD2 mutations identified in cRCC samples.
Sample	DNA mutation	Effect on mRNA	Effect on protein
ccRCC cell lines
RCC-AB	Hem c.6447delC		R2132fsX13
RCC-ER	Hem c.2017T>A		L655X
RCC-FG2	unknown	del exons 19-21	unknown
RCC-JF	Hem.c4189T>C		none
RCC-JW	Hem c.3829G>T		G1259V
RCC-MF	Hem c.5330_5228delAACACACAC		1760-1762delNTH
ccRCC primary tumours
T-3	c.4899G>A		D1616N
T-4	c.7113A>G		T2354A
Hem: hemizygous, del: deletion. NCBI Reference Sequence: NM_014159.6, NP_054878.5
